# Supplementary material for: UV-sensing organic phototransistor memory devices with a doped organic polymer electret composed of triphenylamine-based aggregation-induced emission luminogens
Source: Royal Society of Chemistry journal article supplement (doi:10.1039/c9tc03607e), 2019-01-01
Supplement: c9tc03607e1.pdf [file c9tc03607e1.pdf]

## Supporting Information

### **UV-Sensing Organic Phototransistor Memories with a Doped Organic Polymer Electret Composed of Triphenylamine-Based Aggregation-Induced Emission Luminogens**

*Teng-Yung Huang,<sup>‡</sup> Chia-Hui Chen,<sup>‡</sup> Chia-Chi Lin, Yu-Jung Lee, Cheng-Liang Liu,<sup>\*</sup> and Guey-Sheng Liou<sup>\*</sup>*

T.-Y. Huang, C.-H. Chen, Prof. G.-S. Liou

Institute of Polymer Science and Engineering, National Taiwan University, Taipei 10617, Taiwan. E-mail: gsliou@ntu.edu.tw

Prof. G.-S. Liou

Advanced Research Center for Green Materials Science and Technology, National Taiwan University, Taipei 10617, Taiwan

C.-C. Lin, Y.-J. Lee, Prof. C.-L. Liu

Department of Chemical and Materials Engineering, National Central University, Taoyuan 32001, Taiwan. E-mail: clliu@ncu.edu.tw

Prof. C.-L. Liu

Research Center of New Generation Light Driven Photovoltaic Modules, National Central University, Taoyuan 32001, Taiwan

Keywords: phototransistor; aggregation-induced emission; electret; doping; photomemory

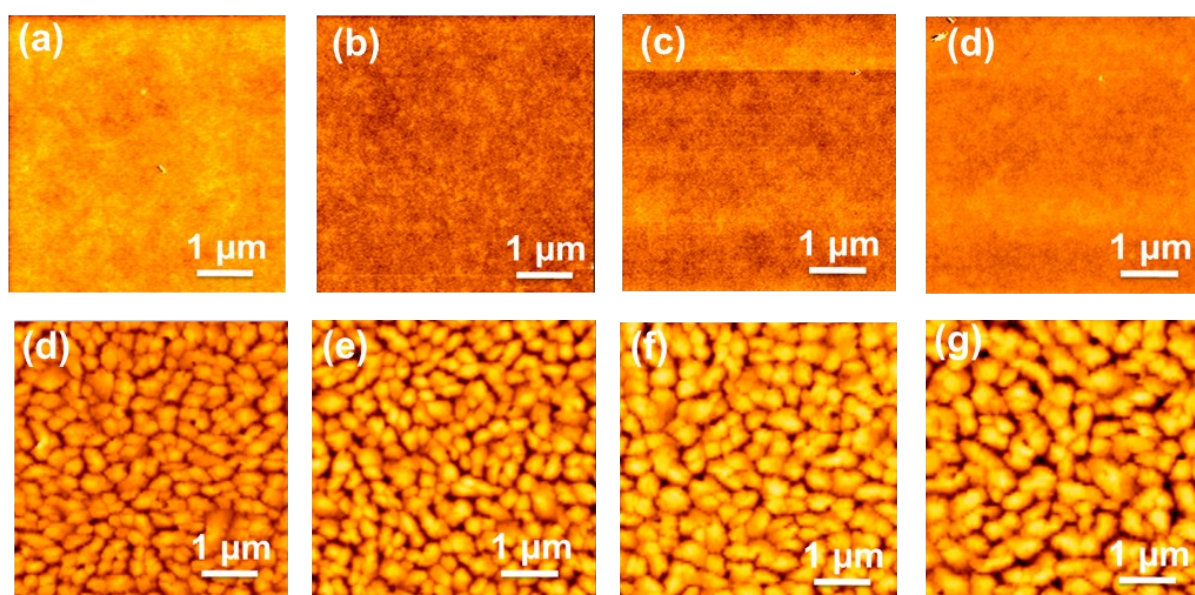

**Figure S1.** AFM topographies of (a) PA, (b) PI, (c) PA-SM5, (d) PI-SM5 and (d-g) petacene on (a-d) coated substrates.

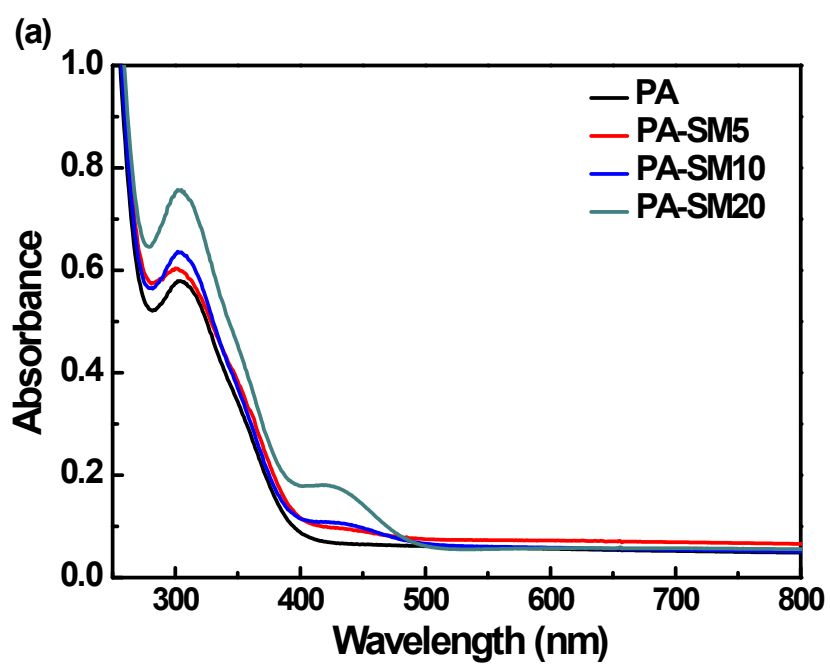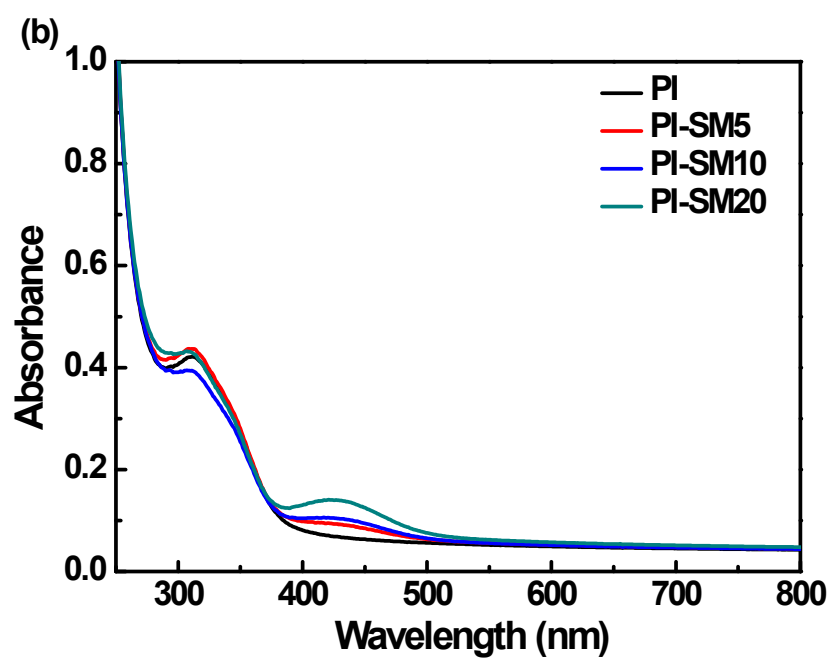

**Figure S2.** UV-Vis spectra of (a) PA and PA-SMX and (b) PA and PI-SMX films.

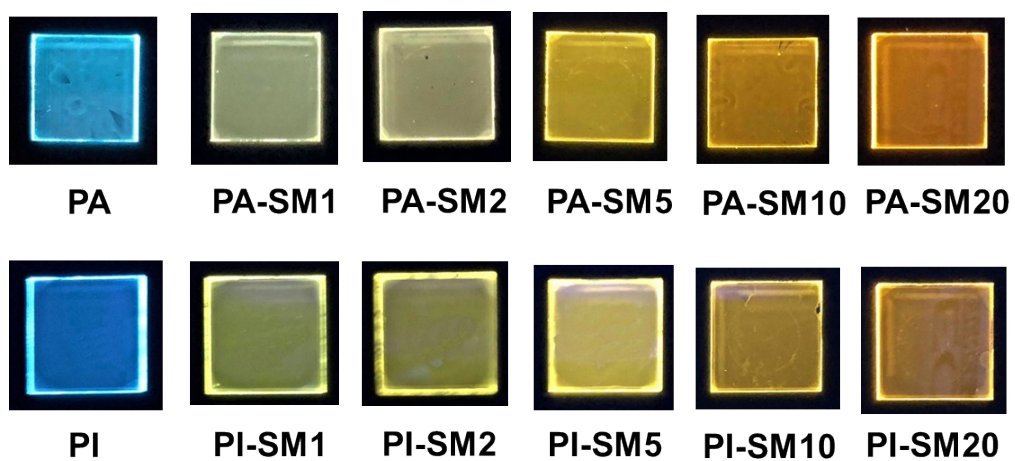

**Figure S3.** Photographs of PA, PA-SMX, PI and PI-SMX films under UV-light illumination.

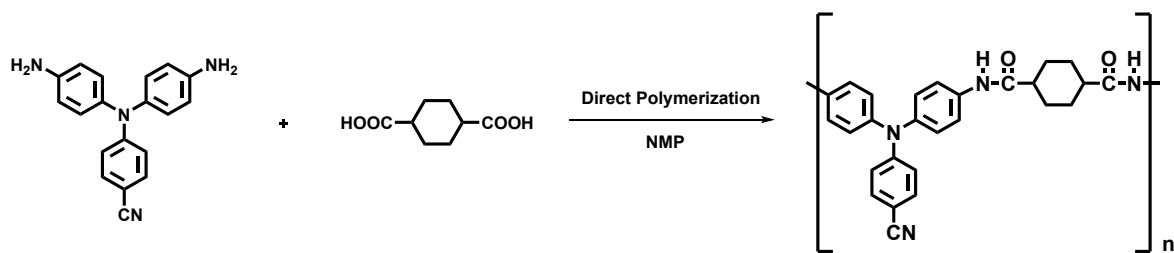

**Scheme S1.** Synthetic route of PA.

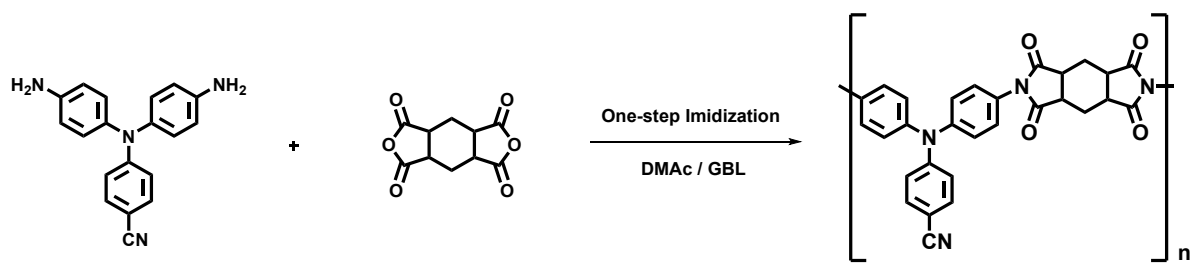

**Scheme S2.** Synthetic route of PI.

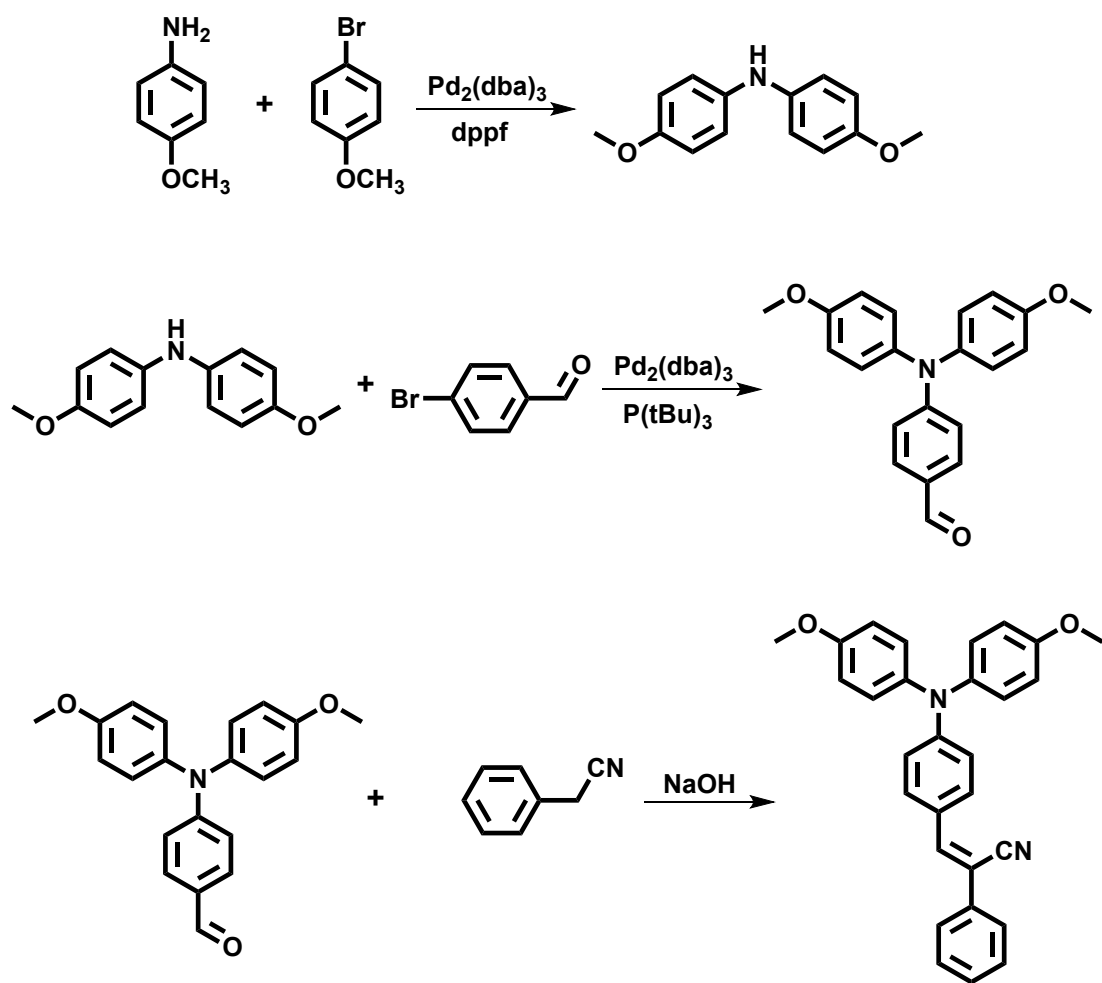

Scheme S3. Synthetic routes of SM.

**Table S1.** Inherent viscosity<sup>a)</sup> and molecular weight<sup>b)</sup> of Polymers.

| Polymer | $\eta_{\text{inh}}$<br>(dL/g) | $M_w$   | $M_n$  | PDI <sup>c)</sup> |
|---------|-------------------------------|---------|--------|-------------------|
| PA      | 1.38                          | 231,700 | 72,000 | 3.22              |
| PI      | 0.49                          | 93,700  | 44,000 | 2.13              |

<sup>a)</sup> Measured at a polymer concentration of 0.5 g/dL in DMAc at 30°C; <sup>b)</sup> Calibrated with polystyrene standards, using NMP as the eluent at a constant flow rate of 0.5 mL/min at 40°C;

<sup>c)</sup> Polydispersity index (PDI) =  $M_w/M_n$ .
